# Supplementary material
Source: Elsevier journal article supplement (https://www.sciencedirect.com/science/article/pii/S2173572716300273)
Supplement: mmc1 [file S2173572716300273:mmc1.docx]

Material Electrónico Suplementario.

Definición de las variables

- **HTA** (hipertensión arterial), se consideró en pacientes que presentaban el antecedente conocido de hipertensión arterial por historia clínica.
- **Cardiopatía isquémica,** se considero en pacientes con antecedentes de síndrome coronario agudo con elevación del ST, sin elevación del ST o angor inestable.
- **IRC (**insuficiencia renal crónica), se considero en pacientes que presentan una disminución de la función renal, expresada por un filtrado glomerular (FG) o por un aclaramiento de creatinina estimados < 60 ml/min/1,73 m2, o como la presencia de daño renal de forma persistente durante al menos 3 meses. Referencia bibliográfica: Levey AS, Coresh J, Balk E, Kausz AT, Levin A, Steffes MW, et al: National Kidney Foundation practice guidelines for chronic kidney disease: evaluation, classification, and stratification. Ann Intern Med 139: 137-147, 2003.
- **Accidente Vascular Cerebral,** se define como la presencia del antecedente de ictus isquémico o hemorrágico establecido o accidente isquémico transitorio.
- **Fibrilación auricular,** se define como el antecedente conocido de la presencia de un ritmo cardiaco irregular sin onda P en un electrocardiograma de 12 derivaciones.
- **Enfermedad arterial periférica**, se define como la presencia de signos de claudicación intermitente o estudio vascular con el diagnostico de arteriopatia periférica.
- **Enfermedad valvular,** se define como la presencia de lesiones valvulares significativas en una ecocardiografía o presencia de válvula cardiaca protésica.
- **EPOC** (enfermedad pulmonar obstructiva crónica), se define como la presencia del antecedente de enfermedad obstructiva crónica en la historia clínica o por presencia de pruebas funcionales respiratorias con patrón diagnóstico de EPOC.
- **Insuficiencia Cardiaca previa:** se define en pacientes que ha n presentado episodios previos de insuficiencia cardiaca aguda o crónica compensada.
- **Índice Barthel < 60 puntos**: se consideró el índice de Barthel basal, previo al inicio del episodio agudo de insuficiencia cardiaca que motiva el ingreso en urgencias. Referencia bibliográfica: Mahoney FI, Barthel DW. Functional evaluation: The Barthel index. Md State Med J 1965;14:61–65.
- **NYHA basal,** se considero la sensación disneica basal previa al episodio agudo de insuficiencia cardiaca que motiva el ingreso en urgencias. La NYHA clasifica la disnea en 4 clases: clase I sin sensación disneica, clase II disnea a grandes esfuerzos, clase III disnea a mediados o mínimos esfuerzos, clase IV disnea en reposo. Referencia bibliográfica: Hurst JW, Morris DC, Alexander RW. The use of the New York Heart Association’s classification of cardiovascular disease as part of the patient’s complete problem list. Clin Cardiol 1999;22:385–390.
- **Diuréticos (de asa o tiazidas)**, es el uso de furosemida, torasemida o hidroclorotiazida por vía oral como pauta habitual de tratamiento.
- **Inhibidores mineralocorticoides**, es el uso de espironolactona o eplerenona por vía oral como pauta habitual de tratamiento.
- **IECAs o ARA II**, es el uso de inhibidores de la enzima convertasa de la angiotensiona o de antagonistas del receptor de la angiotensina II por vía oral como pauta habitual de tratamiento.
- **Calcio Antagonistas**, es el uso de calcioantagonistas por vía oral como pauta habitual de tratamiento.
- **betabloqueantes**, es el uso de tratamiento con betabloqueantes cardioselectivos por vía oral como pauta habitual de tratamiento.
- **Digoxina**, es el uso de digoxina por vía oral como pauta habitual de tratamiento.
- **Amiodarona**, es el uso de amiodarona por vía oral como pauta habitual de tratamiento.
- **Nitratos**, es el uso de nitratos por vía transdérmico o por vía oral como pauta habitual de tratamiento.
- **PAS < 110**, se define como la presencia de una presión arterial sistólica inferior a 110 en el momento de ingreso en urgencias.
- **Taquicardia en reposo**, se define por frecuencia cardiaca > 100 latidos por minuto en el momento de ingreso en urgencias.
- **Saturación de O2 ≤ 90%,** se definió como una determinación con pulsioximetría inferior o igual a 90% en el momento de ingreso en urgencias, sin administración de oxigeno suplementario.
- Disnea, se define como la sensación subjetiva de falta de aire.
- Ortopnea, se define como la sensación de disnea al estar estirado que condiciona la necesidad de incorporase para que esta se alivie.
- DPN (disnea paroxística nocturna), se define como la sensación súbita de disnea durante la noche que despierta al paciente.
- Edemas, se define como la presencia de liquido extracelular en miembros inferiores con fóvea o la presencia de anasarca.
- Hiponatremia (sodio < 135mEq/L), se definió como la presencia de un sodio por debajo de 135 mEq/L en la analítica realizada en el ingreso de urgencias.
- FGe (filtrado glomerular estimado) < 60 ml/min. El cálculo del filtrado glomerular se realizó con la fórmula MDRD. Referencia bibliográfica: Levey AS, Bosch JP, Lewis JB, Greene T, Rogers N, Roth D. A more accurate method to estimate glomerular filtration rate from serum creatinine: a new prediction equation. Modification of Diet in Renal Disease study group. Ann Intern Med. 1999;130:461-70.
- Uso de diuréticos (en perfusión o bolo), se define como el uso de furosemida por vía endovenosa durante el ingreso en urgencias, tanto en pauta de bolo como de perfusión continua.
- Uso de nitratos endovenosos, se define como el uso de solinitrina endovenosa durante el ingreso en urgencias.
- Uso de soporte inotropo o vasopresor, se define como uso de dobutamina, dopamina a dosis vasopresoras (dosis >5μg/kg/min) o noradrenalina durante el ingreso en urgencias.
- Uso de VNI (ventilación no invasiva) en urgencias, se considero en todos los pacientes en los que se aplico una CPAP o una presión de soporte o doble nivel de presión.
